# Supplementary material for: Impaired Albumin Uptake and Processing Promote Albuminuria in OVE26 Diabetic Mice
Source: PubMed Central journal article supplement (PMC5086391; doi:10.1155/2016/8749417), 2016-10-16
Supplement: 8749417.f1.pdf [file 8749417.f1.pdf]

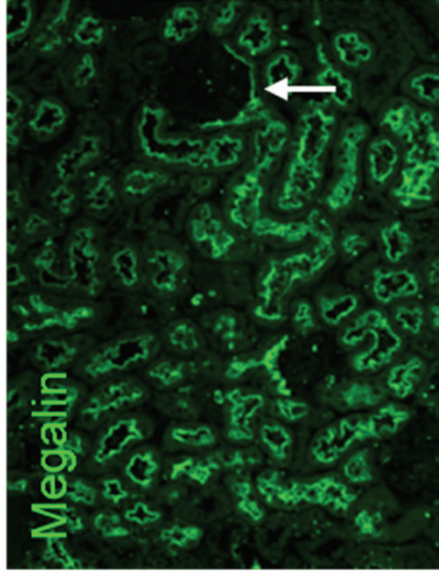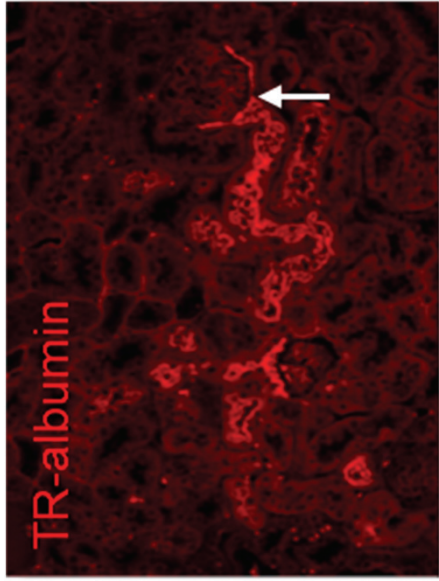

Supplement Figure 1

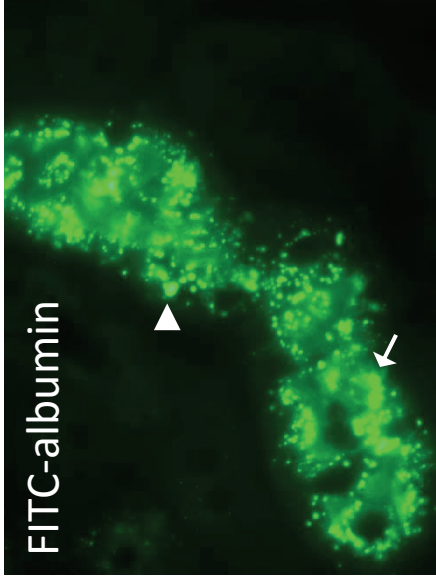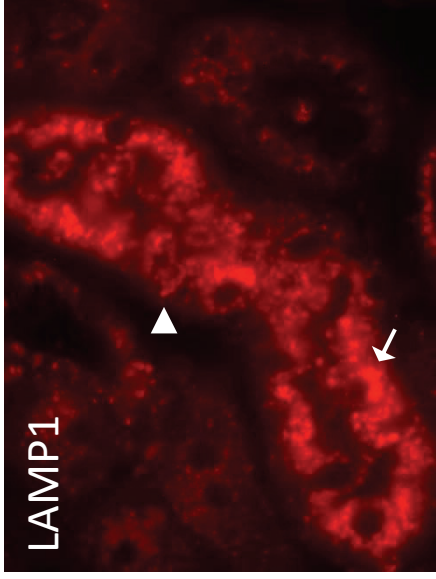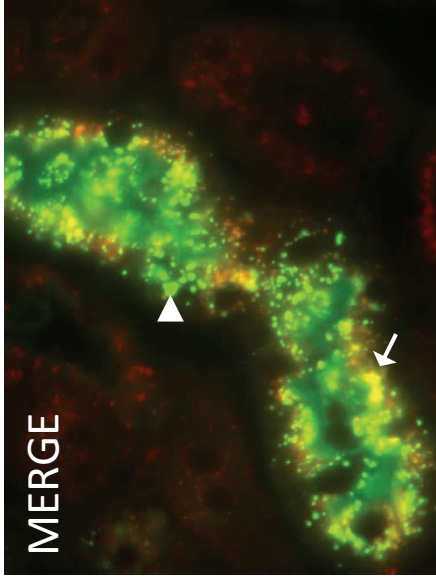

Supplement Figure 2
